# Supplementary material
Source: PubMed Central journal article supplement (PMC6702080)
Supplement: NIHMS1532983-supplement-1.pdf [file NIHMS1532983-supplement-1.pdf]

## Supplementary Information

### **A PCBP1–BoIA2 chaperone complex delivers iron for cytosolic [2Fe-2S] cluster assembly**

Sarju J. Patel<sup>1</sup>, Avery G. Frey<sup>1</sup>, Daniel J. Palenchar<sup>1</sup>, Sooraj Achar<sup>1</sup>, Kimberly Z. Bullough<sup>1</sup>,  
Ajay Vashisht<sup>2</sup>, James A. Wohlschlegel<sup>2</sup>, and Caroline C. Philpott<sup>1\*</sup>.

<sup>1</sup>Genetics and Metabolism Section, NIDDK, NIH, Bethesda, MD and <sup>2</sup>Department of Biological Chemistry, UCLA, Los Angeles, CA.

\*Corresponding author: Caroline C. Philpott, M.D., [Carolinep@mail.nih.gov](mailto:Carolinep@mail.nih.gov)

Chief, Genetics and Metabolism Section

Liver Diseases Branch, NIDDK, NIH

Bldg. 10 Rm. 9B-16

10 Center Drive, MSC 1800

Bethesda, MD 20892-1800

Phone: 301-435-4018; Fax: 301-402-0491

| Flag-PCBP1 |           |           |         |           |         |         |
|------------|-----------|-----------|---------|-----------|---------|---------|
|            | Fe        | Fe        | Fe*     | Dfo       | Dfo     | Dfo*    |
| PCBP1      | 1993/42   | 2800/54   | 3061/43 | 2561/52   | 2784/52 | 2377/33 |
| PCBP2      | 248/11    | 436/17    | 904/15  | 331/16    | 520/15  | 682/15  |
| BolA2      | 3/2 (29%) | 3/3 (41%) | 0       | 2/2 (29%) | 0       | 0       |
| Glr3       | 0         | 0         | 0       | 0         | 0       | 0       |

**Supplementary Table 1: BolA2 detected in immunoprecipitates of Flag-PCBP1 by mass spectrometry.** First number denotes total number of spectra, second number denotes unique peptides, parentheses indicate % coverage; \* indicates washes at 500 mM NaCl. Data are representative of  $n=2$  independent experiments.

| Gene (Supplier)                        | Targeting sequence                                                                                                |
|----------------------------------------|-------------------------------------------------------------------------------------------------------------------|
| Glr3<br>(Stealth siRNA-Thermo Fisher)  | 5'-CCUACCUAUCCUCAGCUCUAUGUUU-3'                                                                                   |
| BolA2<br>(Stealth siRNA-Thermo Fisher) | 5'-UGGUGUCGGCUAAGUUCGAGGGAAA-3'                                                                                   |
| PCBP1<br>(Stealth siRNA-Thermo Fisher) | 5'-GCUCCUCUGGUAGGCAGGUUACU-3'<br>5'-AUAGUAACCUGCCUACCAGAGGAGC-3'                                                  |
| PCBP2<br>(Stealth siRNA-Thermo Fisher) | 5'-CCGGUGUGAUUGAAGGUGGAUUAAA-3'                                                                                   |
| Nfs1<br>(Dharmacon ON-Targetplus pool) | 5'-GGAGCUGAUCCUCGUGAGA-3'<br>5'-UCUCUAUAUGGAUGUGCAA-3'<br>5'-UCCCUUACCUGAAUCAACUA-3'<br>5'-CUUAUGGCUGGGAGAGUGA-3' |

**Supplementary Table 2: siRNA used in this study**

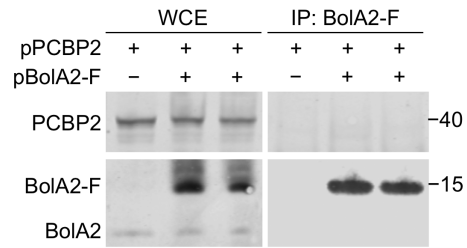

**Supplementary Figure 1. PCBP2 does not bind with BoIA2 in cells.** HEK293 cells transfected with plasmid (p) negative control (-), PCBP2, or BoIA2-Flag (BoIA2-F) were lysed in buffer IP and anti-Flag immunoprecipitation (IP) performed. Whole cell extracts (WCE) and immune complexes were analyzed by immunoblot against PCBP2 and BoIA2. Blots are representative of  $n=3$  independent experiments with similar results. Uncropped western blots are presented in supplementary Figure 19.



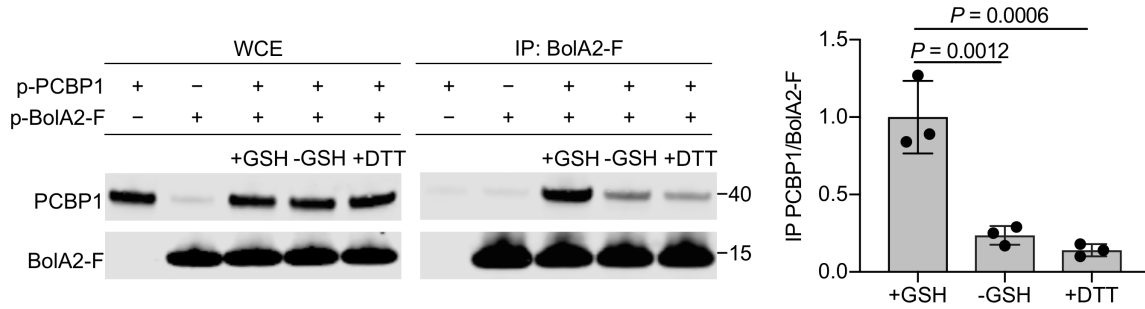

**Supplementary Figure 2. Dithiothreitol does not restore PCBP1-BoIA2 complex in absence of glutathione.** HEK293 cells were transfected with plasmid (p) PCBP1 or BoIA2-Flag (BoIA2-F). Cells were harvested and lysed in buffer IP containing 5 mM glutathione (GSH) or 1 mM dithiothreitol (DTT) and anti-Flag immunoprecipitation (IP) was performed. Whole cell extracts (WCE) and immune complexes (IP: Flag) were analyzed by immunoblotting using antibodies against PCBP1 and BoIA2 (*left*) with quantitation (*right*). Data are means  $\pm$  SD of  $n=3$  independent experiments. Significant  $P$  values ( $P < 0.05$ ), as determined by two-tailed unpaired  $t$ -test relative to +GSH control, are shown. Uncropped western blots are presented in supplementary Figure 20.

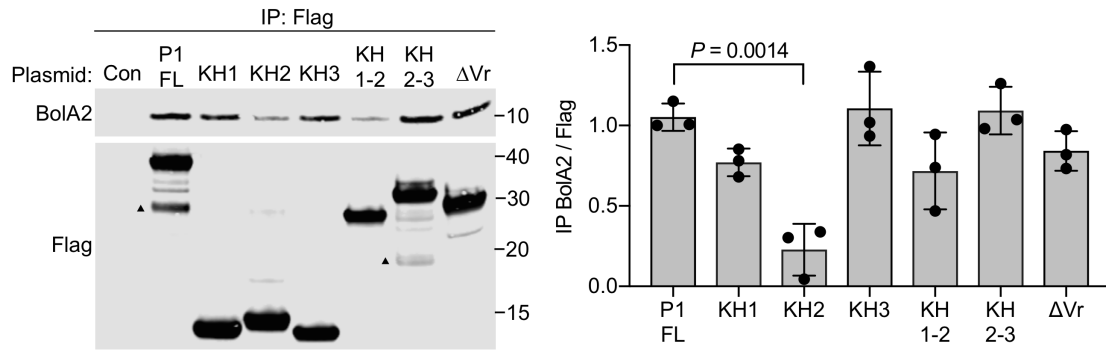

**Supplementary Figure 3. Different K-homology domains of PCBP1 forms complex with BolA2.** HEK293 cells were transfected with plasmid negative control (Con) or Flag tagged full length PCBP1 (P1FL) or indicated KH domains (KH1, KH2, KH3, KH1-2, KH2-3, and  $\Delta Vr$ ). Cells were harvested, lysed and anti-Flag IP was performed. Immune complexes (IP: Flag) were analyzed by immunoblotting using antibodies against BolA2 and Flag (*left*) with quantitation (*right*). ▲ protein degradation of PCBP1. Data are means  $\pm$  SD of  $n=3$  independent experiments. Significant  $P$  values ( $P < 0.05$ ), as determined by two-tailed unpaired  $t$ -test relative to P1FL control, are shown. Uncropped western blots are presented in supplementary Figure 21.

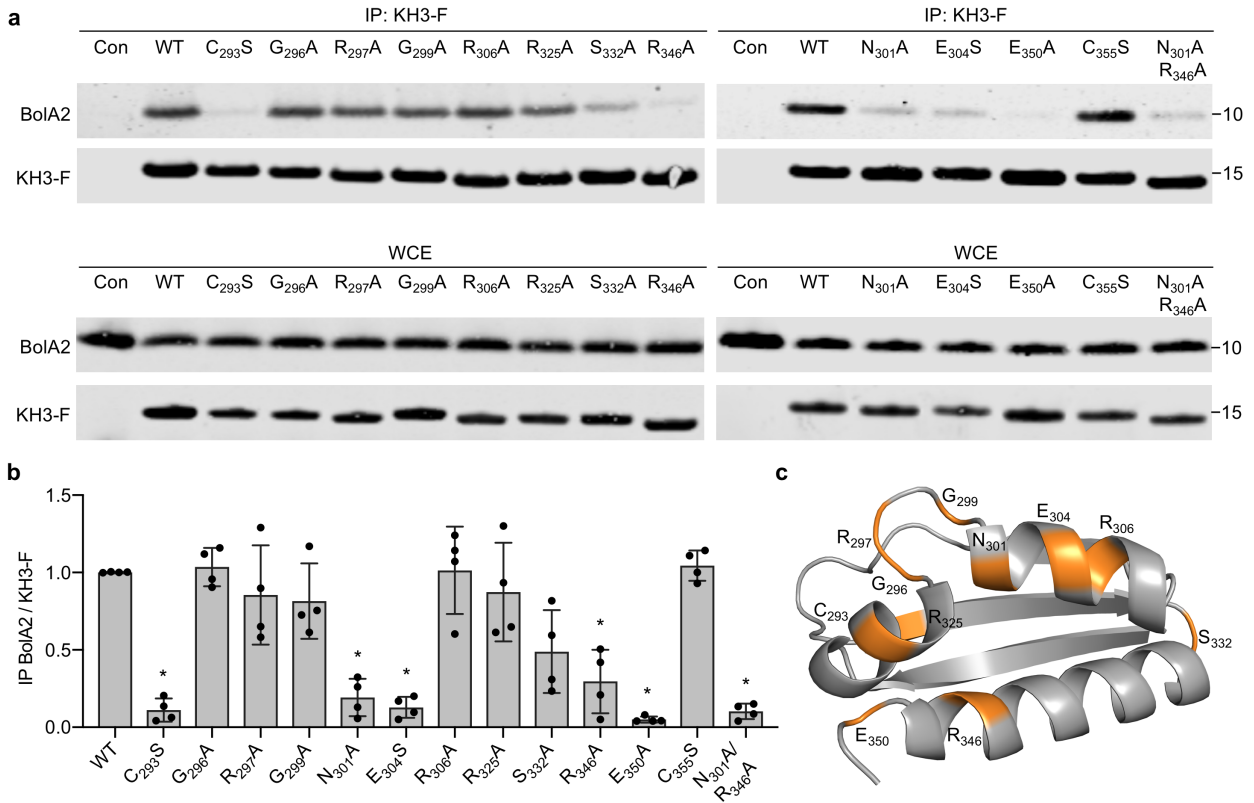

**Supplementary Figure 4. Identification of residues on KH3 domain required for BolA2 interaction.** **a**, BolA2 and different KH3-Flag variants, as indicated, were expressed in HEK293 cells and anti-Flag IP performed. WCE and immune complexes were analyzed by western blot using antibodies against BolA2 and Flag-tag. Blots are representative of  $n=4$  independent experiments with similar results. **b**, Ratio of co-precipitated BolA2 to each KH3-F variant is normalized to WT. Data are means  $\pm$  SD of  $n=4$  independent experiments. Statistical significance level was calculated by one-way ANOVA analysis ( $F = 43.91$ , d.f. = 20,  $P < 0.0001$ ) with a Dunnett's multiple comparison test,  $*P \leq 0.0001$  compared to WT. **c**, Ribbon structure of KH3 domain (PDB: 1WVN) illustrating amino acid residues tested for BolA2 interaction in orange. Uncropped western blots are presented in supplementary Figure 22.

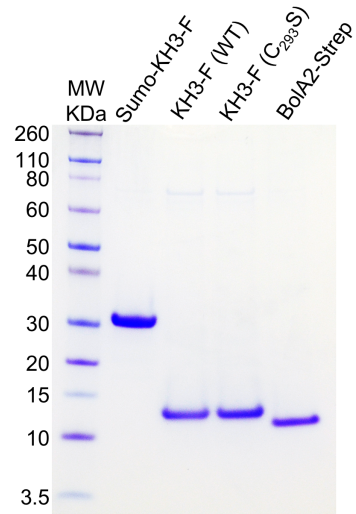

**Supplementary Figure 5. Purification of Sumo-KH3-Flag, KH3-Flag variants (WT and C293S) and BoIA2-Strep proteins.** 5  $\mu$ g of purified Sumo-KH3-Flag, KH3-Flag (WT and C293S) and BoIA2-Strep were resolved in SDS-PAGE and stained with coomassie brilliant blue. Data are representative of  $n=3$  independent experiments with similar results.

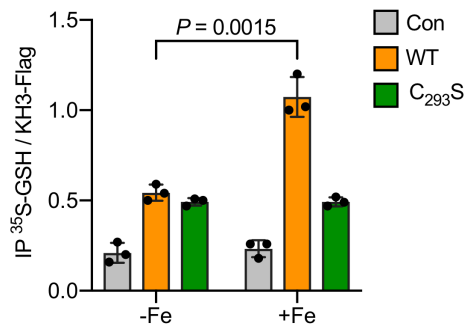

**Supplementary Figure 6. Iron-dependent increase in GSH binding to WT, but not C293S KH3 domain.** Purified WT or C293S KH3-F were captured on anti-Flag resin. Immobilized KH3-F or resin alone (Con) were incubated with 100  $\mu$ M <sup>35</sup>S-GSH, +/- 100  $\mu$ M FeSO<sub>4</sub> and analyzed for <sup>35</sup>S-GSH retention by scintillation counting. Data are means  $\pm$  SD of  $n=3$  independent experiments. Significant  $P$  values ( $P < 0.05$ ), as determined by two-tailed unpaired  $t$ -test relative to WT (-Fe), are shown.

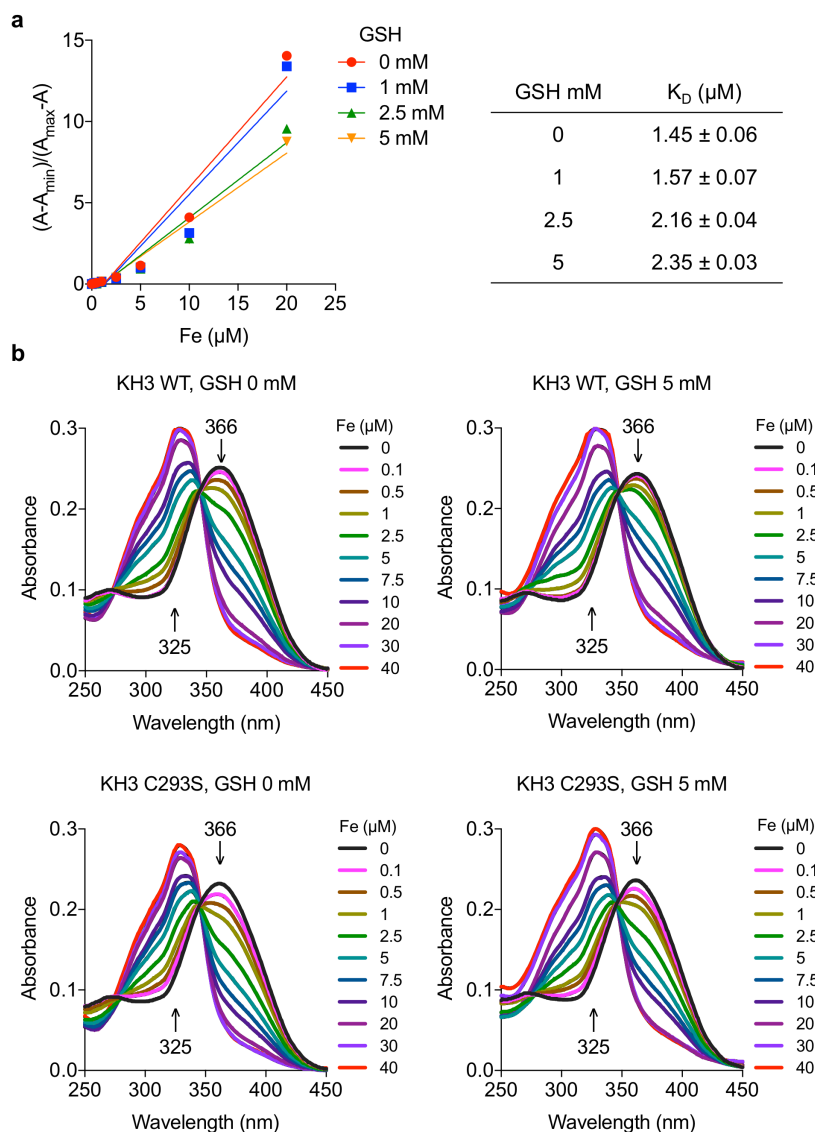

**Supplementary Figure 7. Glutathione does not interfere with iron binding to Mag-fura-2 but contribute to iron binding on KH3 domain of PCBP1.** **a**, Double reciprocal plot show the dependence of the emission ratio on Fe(II) concentration for Mag-fura-2 at different concentrations of glutathione (*left*). Comparison of dissociation constants ( $K_D$ , with Standard Deviations) for Mag-fura-2 with Fe(II) as determined at different concentrations of glutathione (*right*). Data are representative of two independent experiments with similar results. **b**, Absorption spectra of 10  $\mu\text{M}$  Mag-fura-2 in competition with 10  $\mu\text{M}$  KH3 proteins (WT or C293S) with increasing concentrations of  $\text{FeSO}_4$ , in absence of GSH (*left panel*) or in presence of 5 mM GSH (*right panel*). The absorbance maximum of apo-MF2 at 366 nm shifts toward 325 nm concurrent with metal binding. The change in the Mag-fura-2 absorbance at 366 nm was monitored and used to calculate the fractional saturation and apparent  $K_D$  of the protein with Fe(II) (see Figure 6b). Data are representative of  $n=4$  independent experiments with similar results.

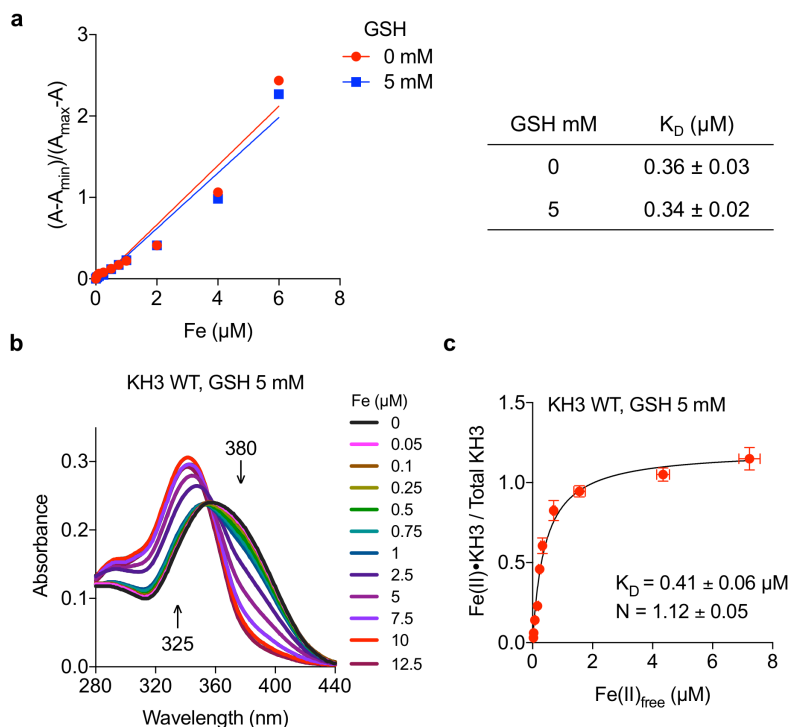

**Supplementary Figure 8. Quantitative determination of iron binding on KH3 domain of PCBP1 using Fura-4f.** **a**, Double reciprocal plot show the dependence of the emission ratio on Fe(II) concentration for Fura-4f at different concentrations of glutathione (*left*). Comparison of dissociation constants ( $K_D$ , with Standard Deviations) for Fura-4f with Fe(II) as determined at different concentrations of glutathione (*right*). Data are representative of two independent experiments with similar results. **b**, Absorption spectra of 10  $\mu\text{M}$  Fura-4f in competition with 10  $\mu\text{M}$  wild type KH3 protein with increasing concentrations of  $\text{FeSO}_4$ , in presence of 5 mM GSH. The absorbance maximum of apo-Fura-4f at 380 nm shifts toward 325 nm concurrent with metal binding. Data are representative of  $n=4$  independent experiments with similar results. **c**, The absorbance decrement at 380 nm was monitored and used to calculate the fractional saturation of the protein with Fe(II). The data were fitted by Michaelis-Menten analysis to obtain the dissociation constant ( $K_D$ ) and stoichiometry ( $N$ ). Data are means  $\pm$  SD of  $n=4$  independent experiments.

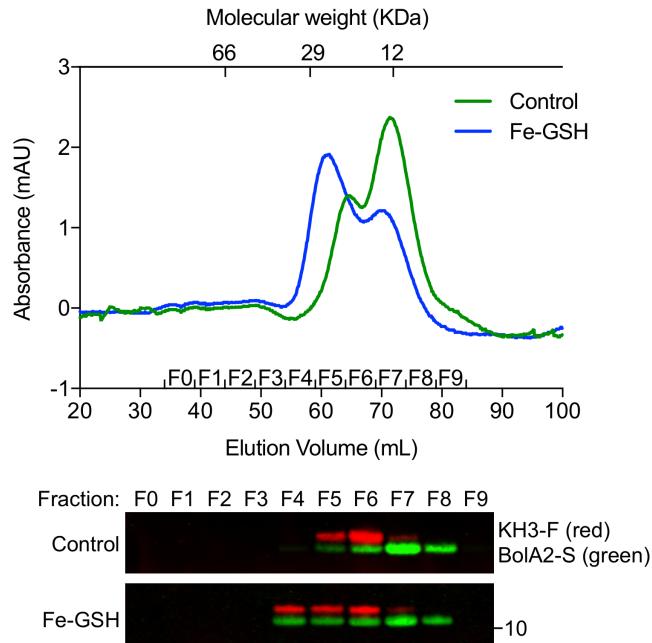

**Supplementary Figure 9. Isolation of KH3-BoIA2 heterodimer complex using size exclusion chromatography.** Representative chromatograph (*upper panel*) of size-exclusion analysis of purified KH3-Flag and BoIA2-Strep proteins in absence (control) or presence of 100  $\mu\text{M}$   $\text{FeSO}_4$  and 1 mM GSH (Fe-GSH). Collected fractions were analyzed by Western blot using antibodies against BoIA2 and Flag-tag (*lower panel*). Data are representative of two independent experiments with similar results. Uncropped western blots are presented in supplementary Figure 23.



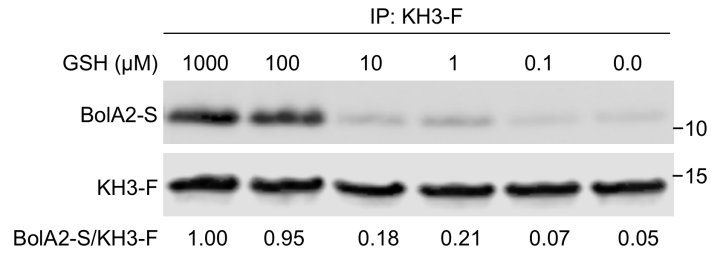

**Supplementary Figure 10. Glutathione is required for PCBP1-BolA2 complex formation *in vitro*.** Purified BolA2-Strep and wild type KH3-Flag were mixed in the buffer IP containing 100  $\mu$ M FeSO<sub>4</sub> with different concentration of GSH as indicated and anti-Flag IP performed. Immune complexes (IP: Flag) were analyzed by western blot and ratio of BolA2 to IP KH3-F was calculated. Blots are representative of  $n=3$  independent experiments with similar results. Uncropped western blots are presented in supplementary Figure 24.

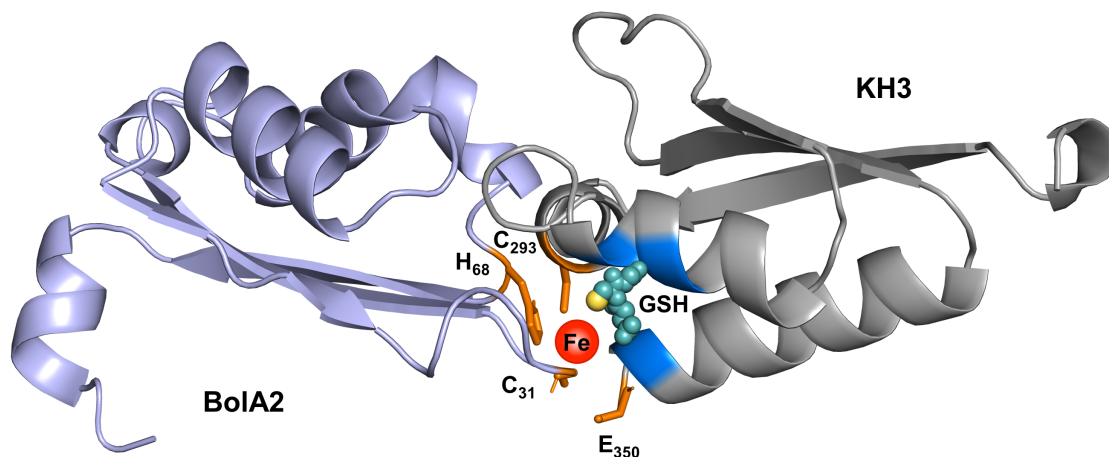

**Supplementary Figure 11. A model for electrostatic interaction between BoIA2 and KH3 domain.** Ribbon structures of BoIA2 (*light blue*) and KH3 domain (*grey*), illustrating the iron binding ligands (*orange, stick*) and GSH binding ligands (*blue*), coordinating the iron (*red, sphere*) and GSH (*teal, sphere*). Model was generated using ClusPro 2.0 protein docking platform and PyMOL version 2.2.

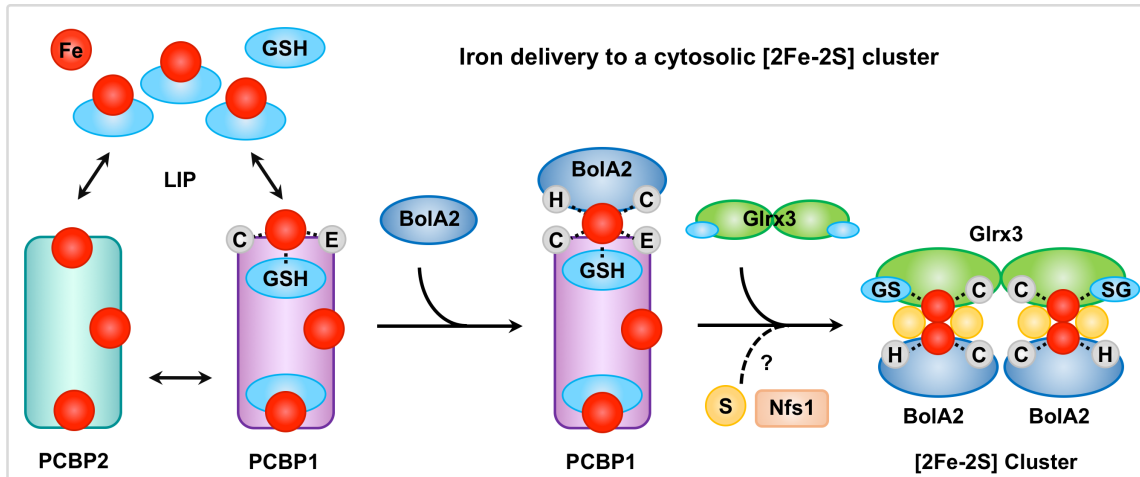

**Supplementary Figure 12. A model for the PCBP1 mediated iron delivery to cytosolic Fe-S cluster assembly via BolA2.** PCBP1 and PCBP2 are iron chaperones that play integral role in intracellular iron trafficking. Structurally PCBPs contain three tandem K-homology domains (KH1-3). Iron (Fe(II)) may be coordinated by reduced glutathione (GSH) in the cytosolic labile iron pool (LIP). Individual domain of PCBP1 can bind GSH coordinated Fe(II) with high affinity in 1:1 ratio. Cytosolic BolA-like protein (BolA2) can form a complex with Fe(II)-GSH containing PCBP1. Ferrous iron delivered by PCBP1-BolA2 complex can be combine with sulfur compound (possible exported from mitochondria), with the help of other cytosolic Fe-S cluster assembly proteins, to form a primary [2Fe-2S] cluster. Cytosolic monothiol glutaredoxin, Glrx3 and BolA2 can form heterotrimeric complex that coordinate a pair of bridging [2Fe-2S] clusters.

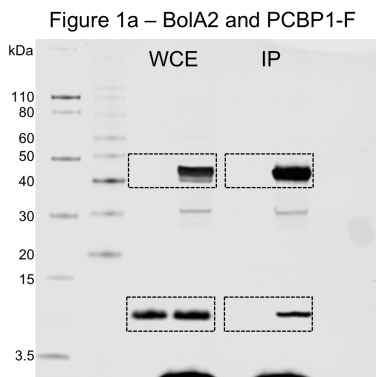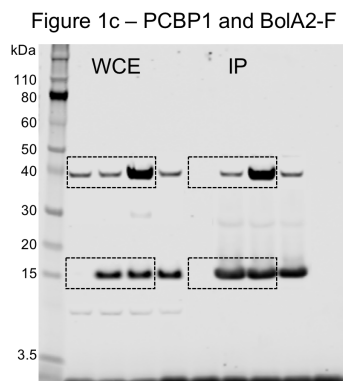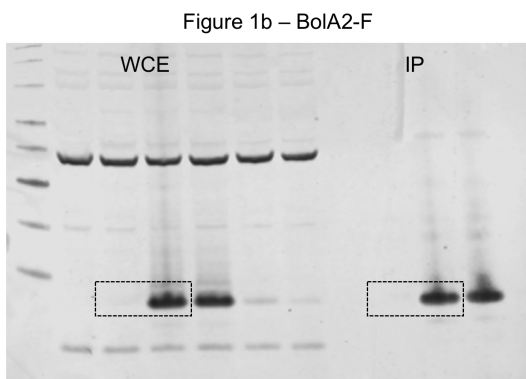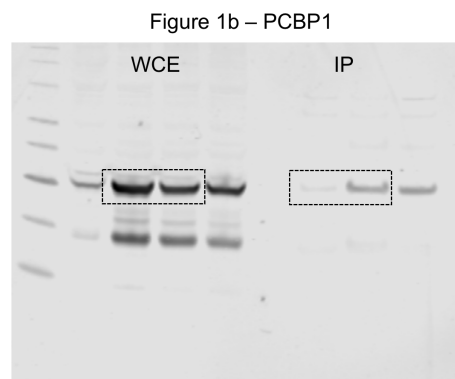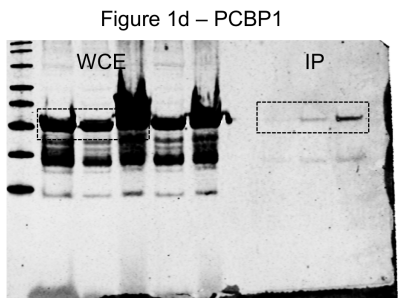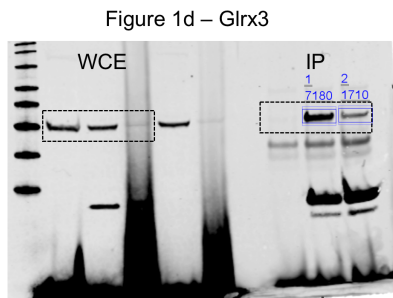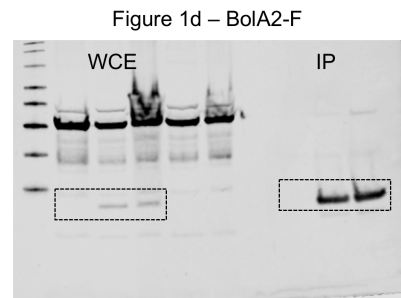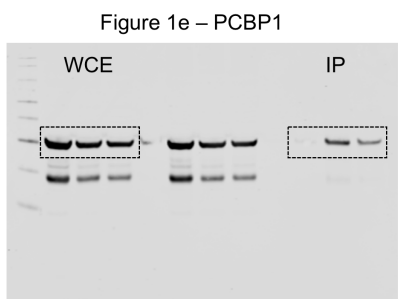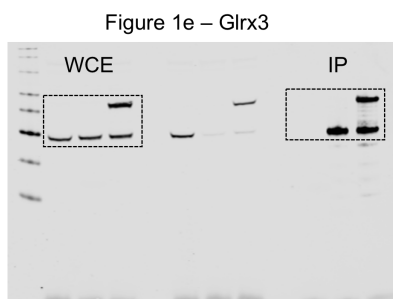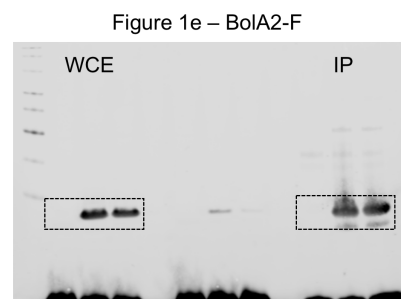

Supplementary Figure 13. Uncropped Western blots related to Figure 1.

Figure 2a – BolA2

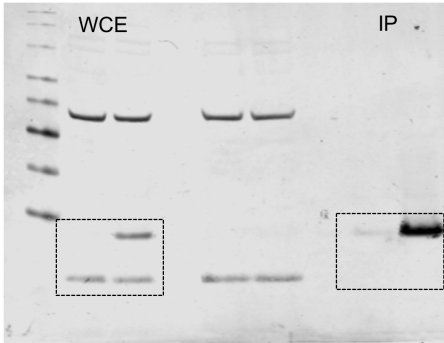

Figure 2b – Glx3

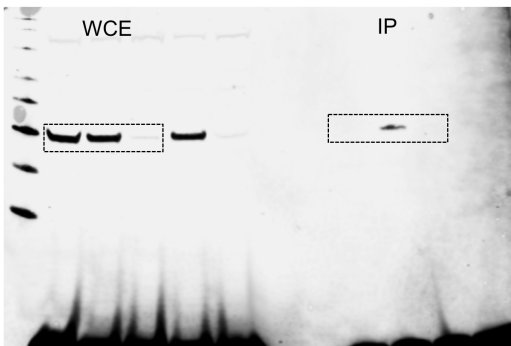

Figure 2b – BolA2

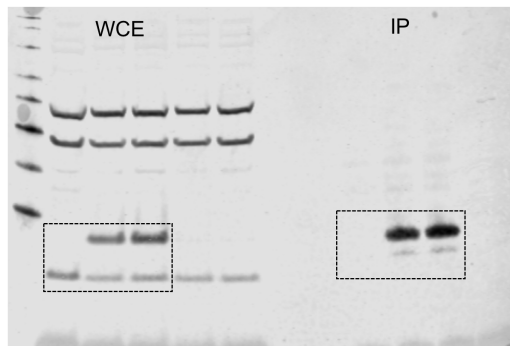

Figure 2c – PCBP1 and BolA2-F

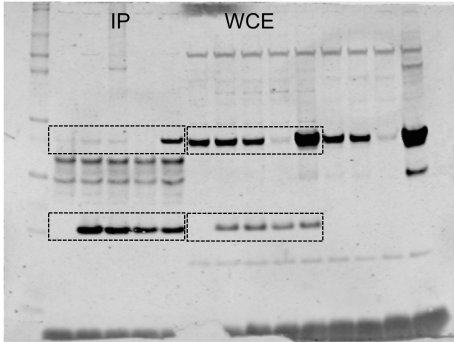

Figure 2c – Glx3

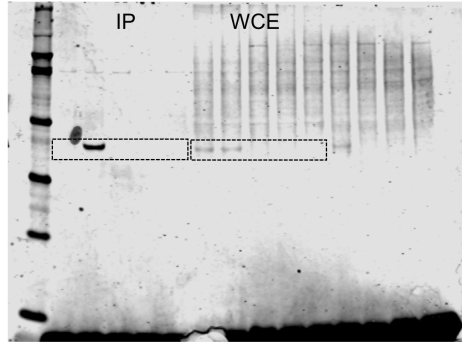

Supplementary Figure 14. Uncropped Western blots related to Figure 2.

Figure 3a – PCBP1 and BolA2-F

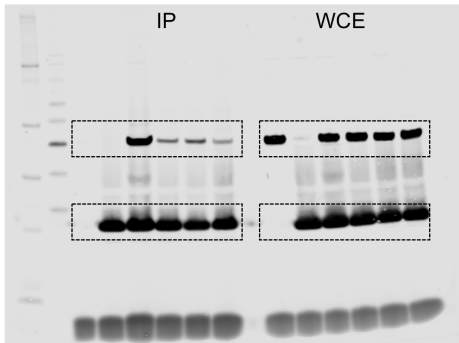

Figure 3b – Nfs1

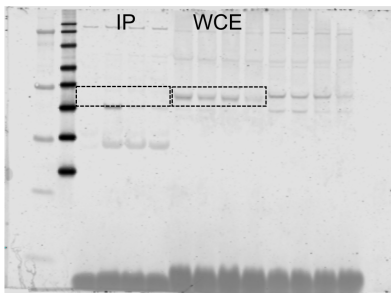

Figure 3b – Glrx3

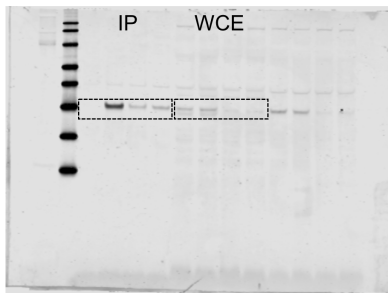

Figure 3b – PCBP1 and BolA2-F

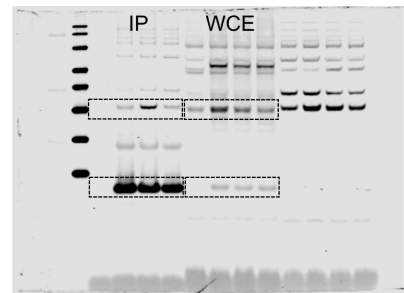

Figure 3c – PCBP1

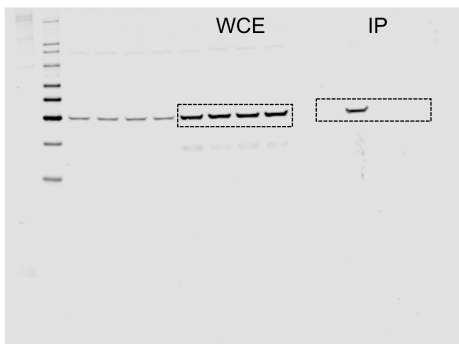

Figure 3c – Glrx3 and BolA2-F

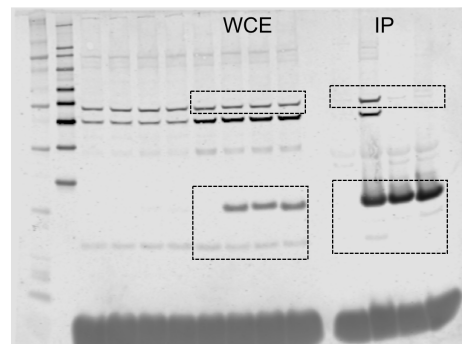

Supplementary Figure 15. Uncropped Western blots related to Figure 3.

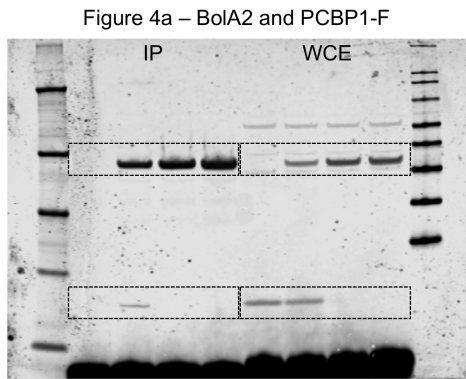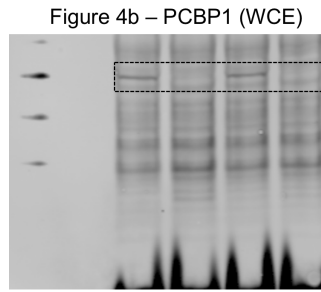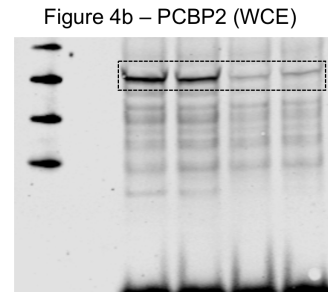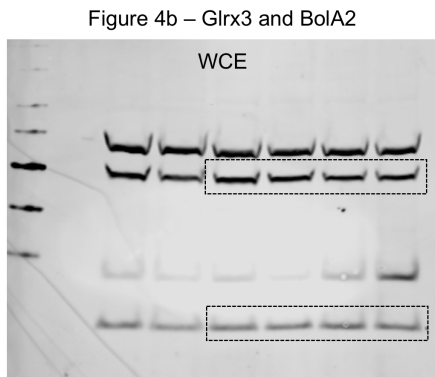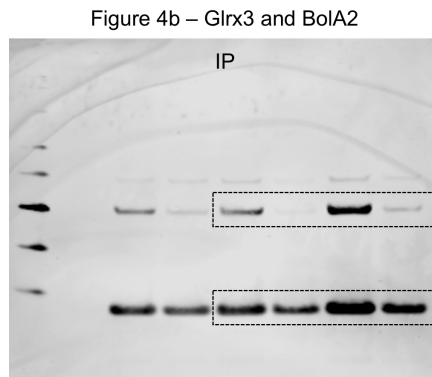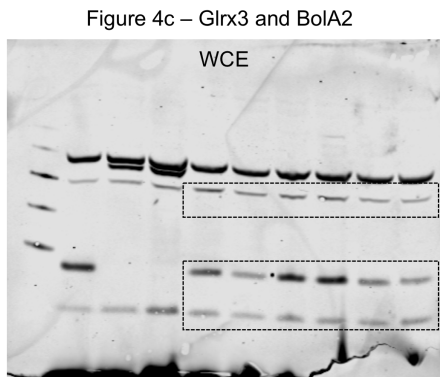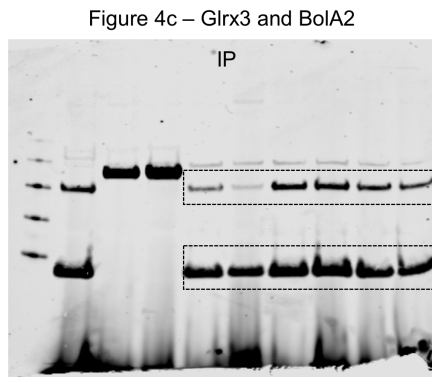

**Supplementary Figure 16. Uncropped Western blots related to Figure 4.**

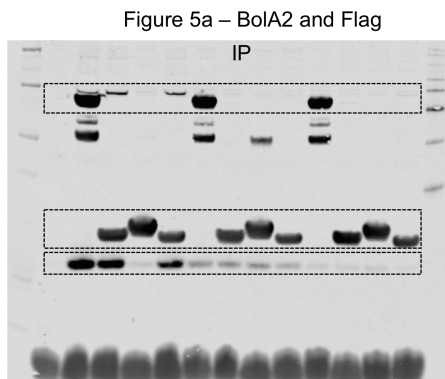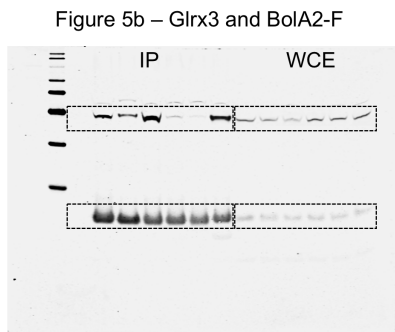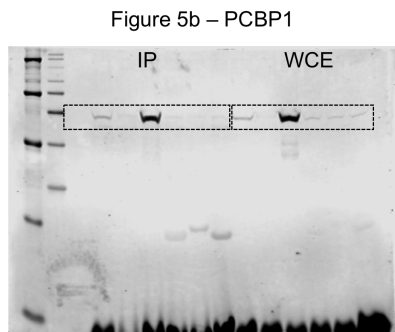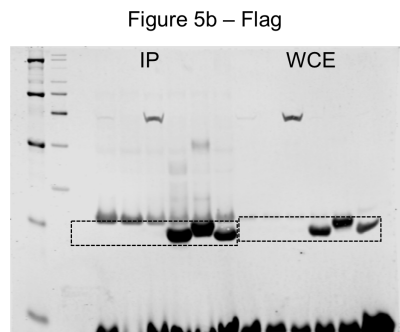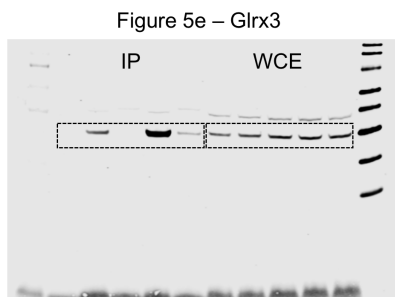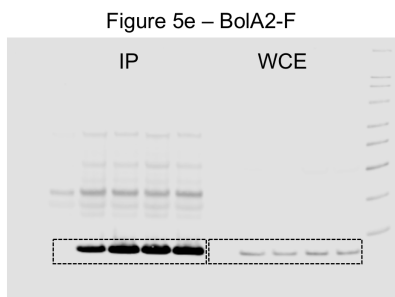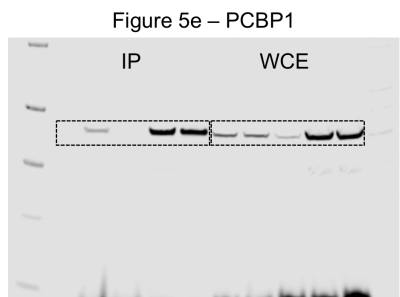

Supplementary Figure 17. Uncropped Western blots related to Figure 5.



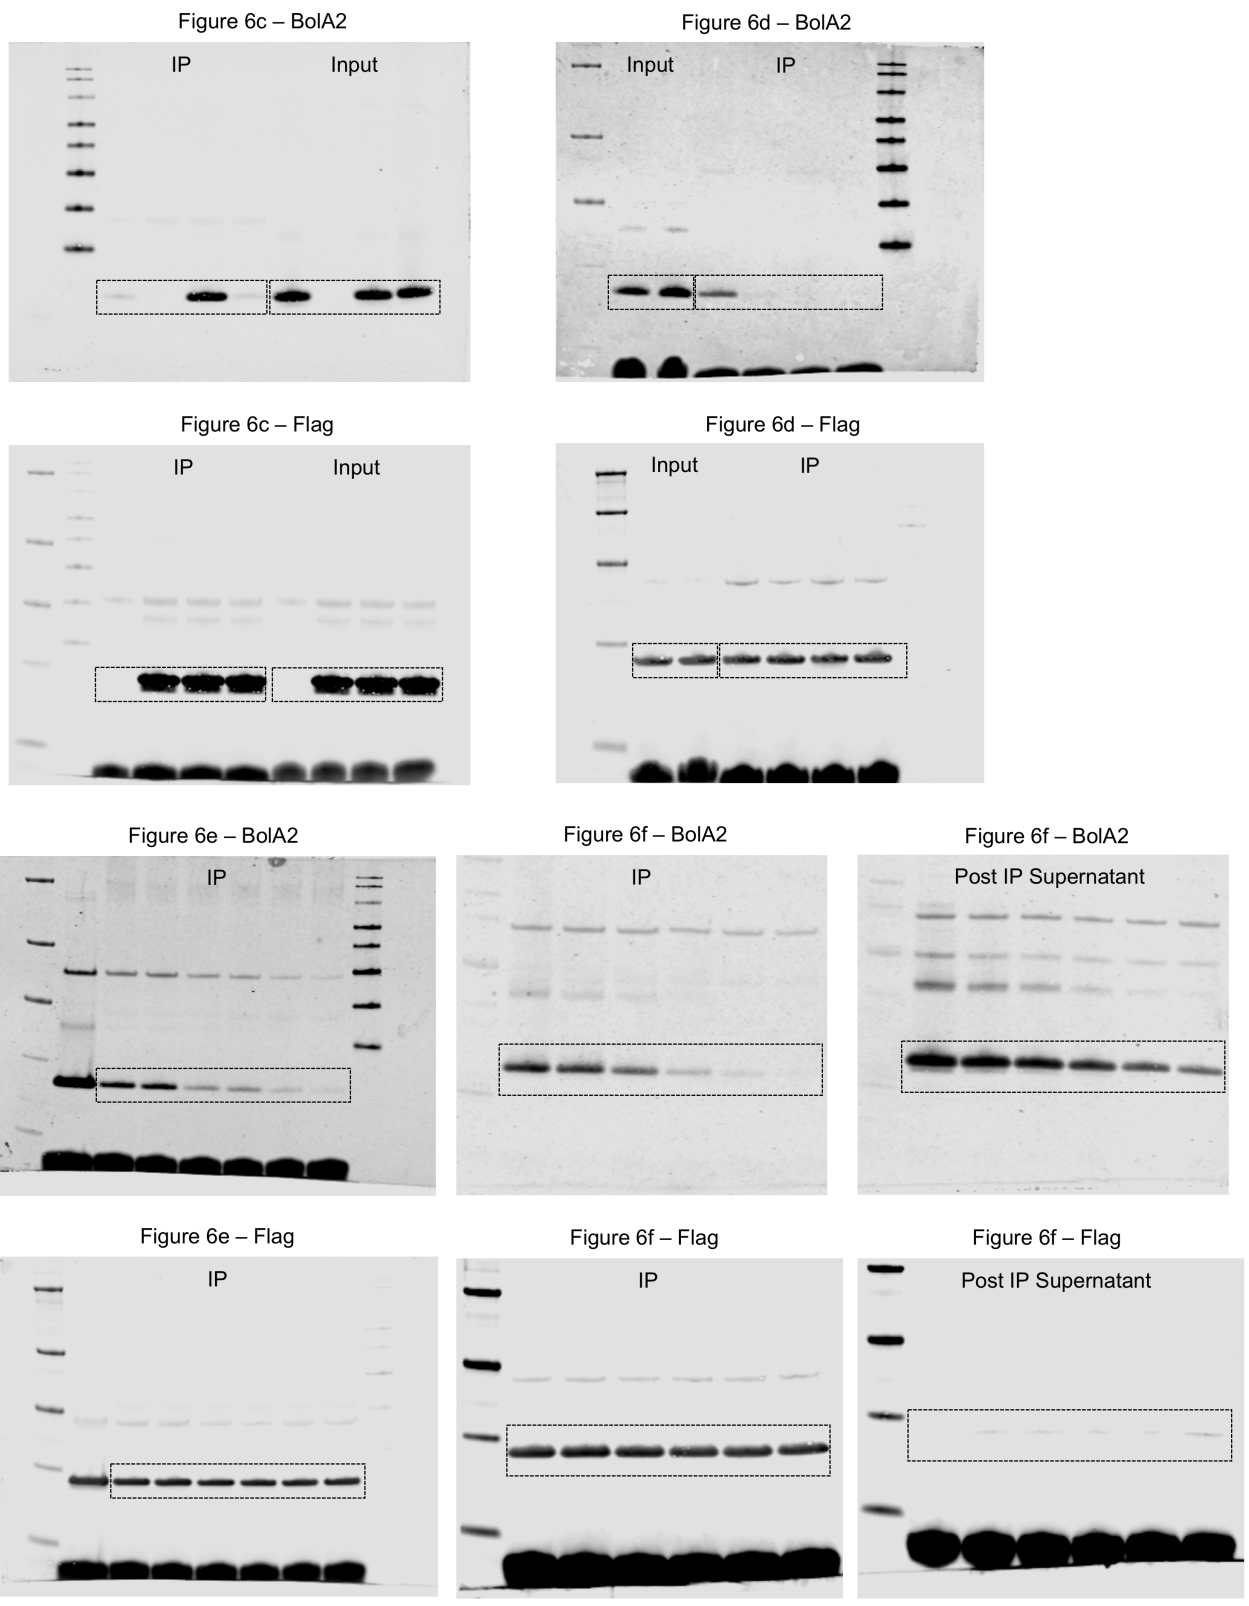

Supplementary Figure 18. Uncropped Western blots related to Figure 6.

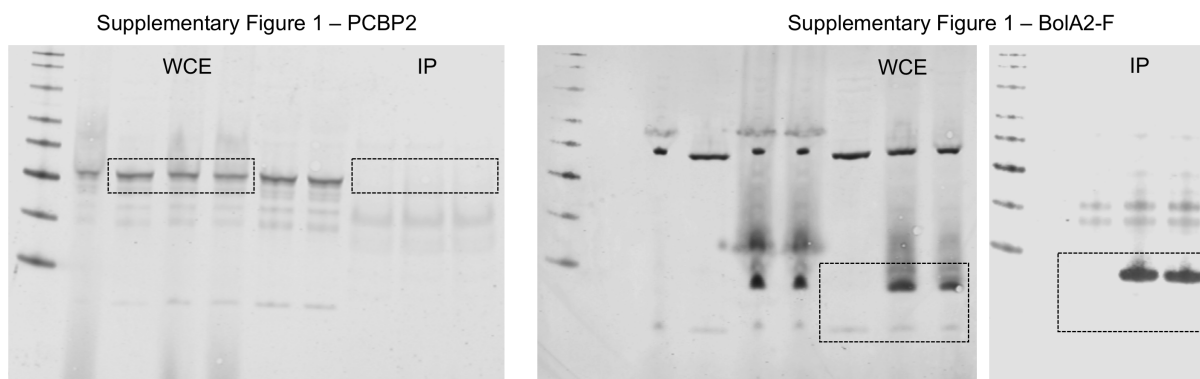

**Supplementary Figure 19. Uncropped Western blots related to Supplementary Figure 1.**

Supplementary Figure 2 – PCBP1 and BoIA2

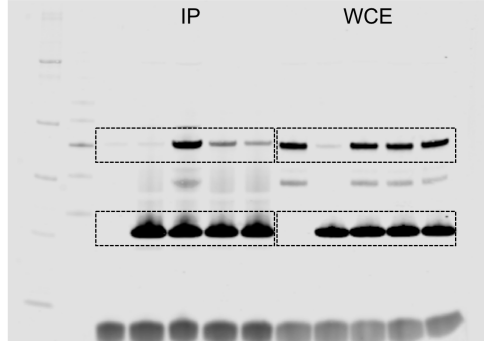

Supplementary Figure 20. Uncropped Western blots related to Supplementary Figure 2.

Supplementary Figure 3 – Flag and BoIA2

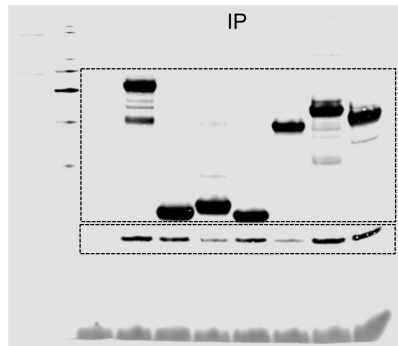

**Supplementary Figure 21. Uncropped Western blots related to Supplementary Figure 3.**

Supplementary Figure 4 – BoIA2 and Flag

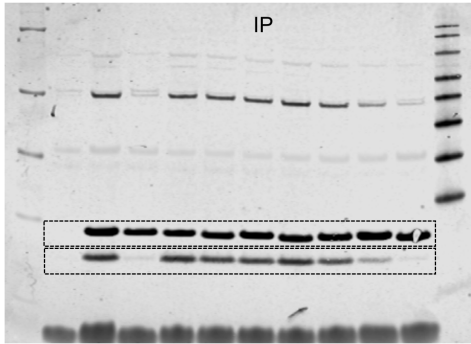

Supplementary Figure 4 – BoIA2 and Flag

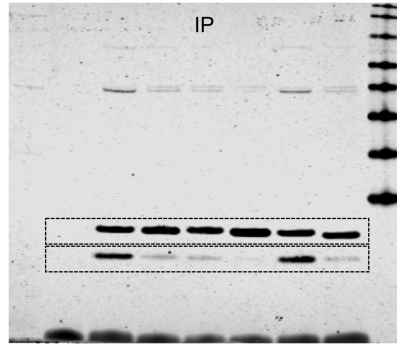

Supplementary Figure 4 – BoIA2 and Flag

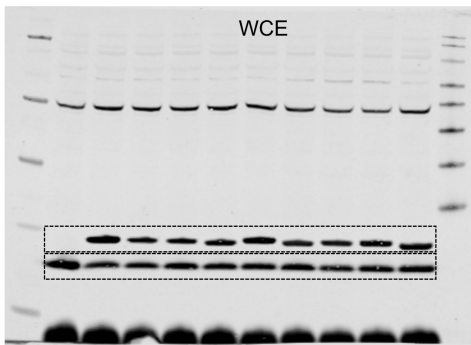

Supplementary Figure 4 – BoIA2 and Flag

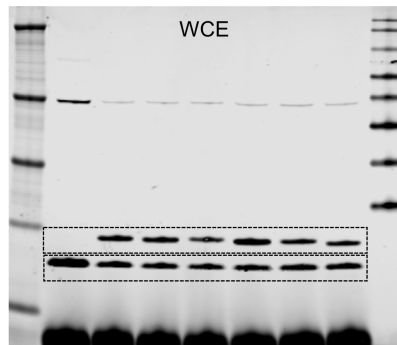

**Supplementary Figure 22. Uncropped Western blots related to Supplementary Figure 4.**

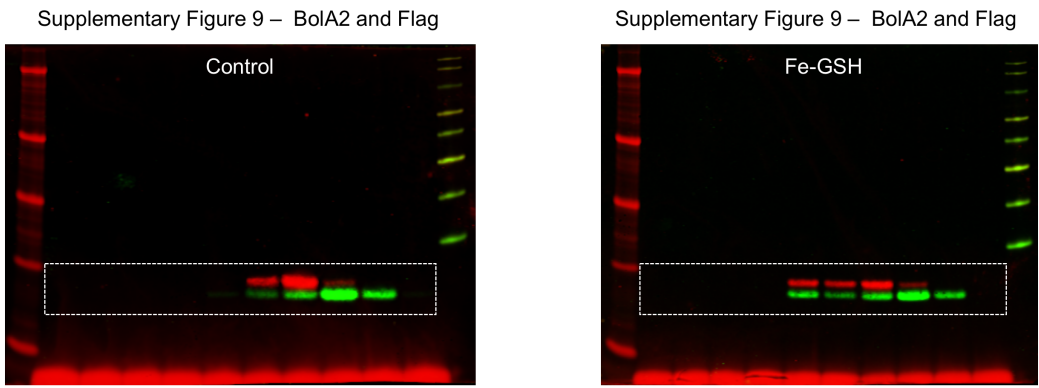

**Supplementary Figure 23. Uncropped Western blots related to Supplementary Figure 9.**

Supplementary Figure 10 – Flag

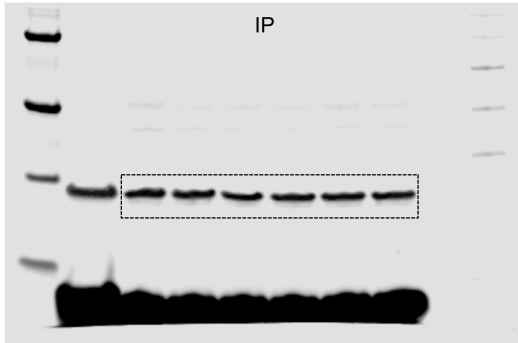

Supplementary Figure 10 – BoIA2

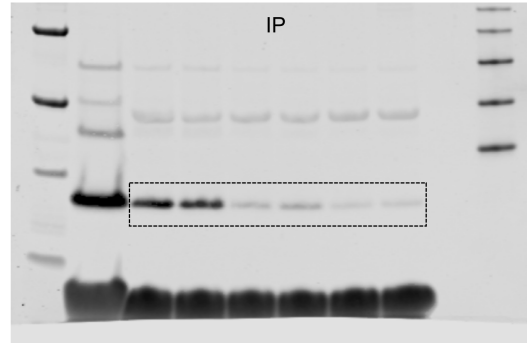

**Supplementary Figure 24. Uncropped Western blots related to Supplementary Figure 10.**
