# Supplementary material
Source: PubMed Central journal article supplement (PMC6702080)

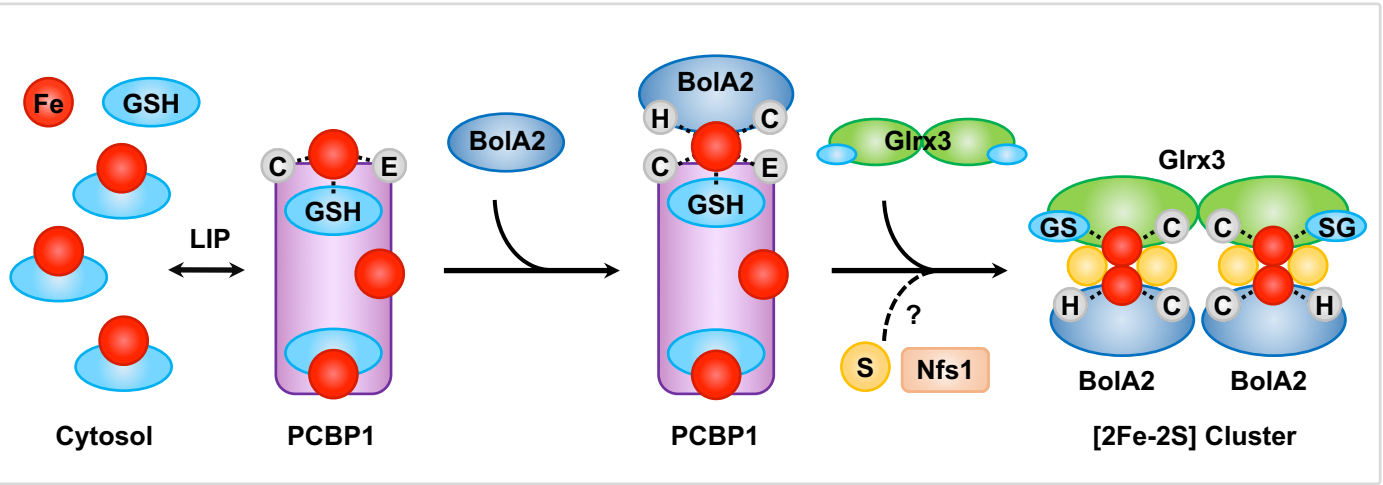

Supplement: NIHMS1532983-supplement-Fig_graphic.pdf [file NIHMS1532983-supplement-Fig_graphic.pdf]
